# Supplementary material for: Corporate Social Responsibility on Twitter: A Review of Topics and Digital Communication Strategies’ Success Factors
Source: Preprints.org preprint supplement (doi:10.20944/preprints202211.0427.v1), 2022-11-23
Supplement: Supplementary file 1 [file supplementary]

| **No.** | **Author** | **Publication year** | **Geographical focus** | **Industry/ Sector** | **Sample Size** | **Sample Tweet Number** | **Jounal** |
| --- | --- | --- | --- | --- | --- | --- | --- |
|  |  |  |  |  | **Twitter Accounts** | **Tweets/ Retweets/ Replies** |  |
| **1** | Amin et al. | **2021** | UK |  | not disclosed | 67.908 | International Journal of Accounting Information Systems |
| **2** | Baboukardos et al. | **2021** | global, Canada, USA, Australia, China, Japan, Germany, Italy, Spain UK |  | 483 | 4.484 | Corporate Governance: The International Journal of Business in Society |
| **3** | Burton et al. | **2017** | USA |  | 63 | 32.641 | The Journal of Brand Management : An International Journal |
| **4** | Chae & Park | **2018** | global |  | not disclosed | 178.908 | Sustainability |
| **5** | Cortado & Chalmeta | **2016** | Spain |  | 20 | 5.106 + 416 FB postings | Cogent Business & Management |
| **6** | Dong & Rim | **2018** | USA |  | 65 | 5.859 | Public Relations Review |
| **7** | Esposito et al. | **2021** | Italy | Education | 1 | not diclosed | Administrative Sciences |
| **8** | Etter | **2013** | global |  | 30 | 41.864 | Public Relations Review |
| **9** | Etter | **2014** | global |  | 30 | 41.864 | Journal of Communication Management |
| **10** | Fröhlich & Knobloch | **2021** | Germany |  | 36 | 154.770 | Public Relations Review |
| **11** | Giacomini et al. | **2021** | Italy | News Media | 6 | 6.666 | Corporate Governance: The International Journal of Business in Society. |
| **12** | Gómez-Carrasco et al. | **2021** | Spain | Banking | 41 | 2.816 | The European Accounting Review |
| **13** | Grover et al. | **2019** | global |  | 93 | 194.644 | International Journal of Information Management |
| **14** | Holidayet al. | **2021** | global | Consumer Brands | 3.093 | 44.432 | Journal of Interactive Advertising |
| **15** | Jiang & Park | **2022** | global |  | 71 | 22.951 | Public Relations Review |
| **16** | Joo et al. | **2021** | USA | Alcohol | 175** | n.a. | International Journal of Advertising |
| **17** | Kaul & Chaudhri | **2019** | India |  | 34 | 4.091 | CSR Communication Conference |
| **18** | Kollat & Farache | **2017** | UK |  | 507** | n.a. | The Journal of Consumer Marketing |
| **19** | Lee et al. | **2013** | global |  | 222 | not disclosed | Journal of Business Ethics |
| **20** | Lee et al. | **2019** | USA | Alcohol | 177** | n.a. | Journal of Interactive Advertising |
| **21** | Lee et al. | **2020** | USA | Alcohol | 839** | n.a. | Journal of Interactive Advertising |
| **22** | Maani-Hessari et al. | **2019** | UK, Ireland, Australia | Alcohol | 6 | 1.805 | International Journal of Environmental Research and Public Health |
| **23** | Maiorescu-Murphy | **2022** | USA |  | 5 | 2.217 | Public Relations Review |
| **24** | Mamic & Almaraz | **2013** | Spain |  | 35 | 5.352 | International journal of market research |
| **25** | Okazaki et al. | **2020** | global |  | 8 | 428.000 | Journal of Business Research |
| **26** | Overton et al. | **2021** | USA |  | 219** | n.a. | Public Relations Review |
| **27** | Patuelli et al. | **2021** | Italy |  | 417 | 917.864 | PLOS ONE |
| **28** | Pilar et al. Ivana Tichá1 and Martina Chalupová | **2019** | global |  | 223.476 | 414.926 | Sustainability |
| **29** | Pons et al. | **2021** | globar | Mining | not disclosed | 2.000.000 | Resources Policy |
| **30** | Reilly & Larya | **2018** | global | Consumer Apparel | 11 | 187.177 | Environmental Communication |
| **31** | Rodríguez & Chalmeta | **2020** | global |  | 50 | 127.811 | International Journal of Web Based Communities |
| **32** | Saxton et al. | **2019** | global |  | 38 | 1.125 | Journal of Business Ethics |
| **33** | Saxton et al. | **2021** | global |  | 42 | 163.402 | Journal of business ethics |
| **34** | Shi | **2020** | global |  | 41 | 1.079 | International Journal of Strategic Communication |
| **35** | Steenkamp Rensburg | **2018** | South Africa | Banking | 2 | 2.719 | Communicatio |
| **36** | Suárez-Rico et al. | **2018** | Chile, Colombia, Mexico, Peru | | 93 | 1.657 | Sustainability |
| **37** | Uzunoğlu et al. | **2017** | Turkey |  | 253** | n.a. | Public Relations Review |
| **38** | Vo et al. | **2019** | USA | Airline | 6 | not diclosed | Journal of Business Ethics |
| **39** | Watts et al. | **2019** | International with focus on UK, USA & Japan | Tabacco | 4 | 3.301 | Tabacco Control |
| **40** | Xu & Saxton | **2019** | USA |  | 198 | not disclosed | Nonprofit and Voluntary Sector Quarterly : Journal of the Association for Research on Nonprofit Organizations and Voluntary Action |
| **41** | Yuan | **2019** | China, Japan |  | 30 + 54 FB accounts | 2.672 | Chinese Journal of Communication |
| **42** | Zhou et al. | **2022** | global | Container Shipping | 8 | 6.566 | Marine Policy |
|  |  |  |  |  |  |  |  |
|  | *specific corporte CSR accounts | | |  |  |  |  |
|  | **experiment participants | |  |  |  |  |  |
